# Supplementary material for: Establishing immune scoring model based on combination of the number, function, and phenotype of lymphocytes
Source: publisher site journal article supplement (doi:10.18632/aging.103208), 2020-05-12
Supplement: Supplementary file [file aging-v12i10-103208-supplementary-material-SD1.pdf]

**SUPPLEMENTARY FIGURE**

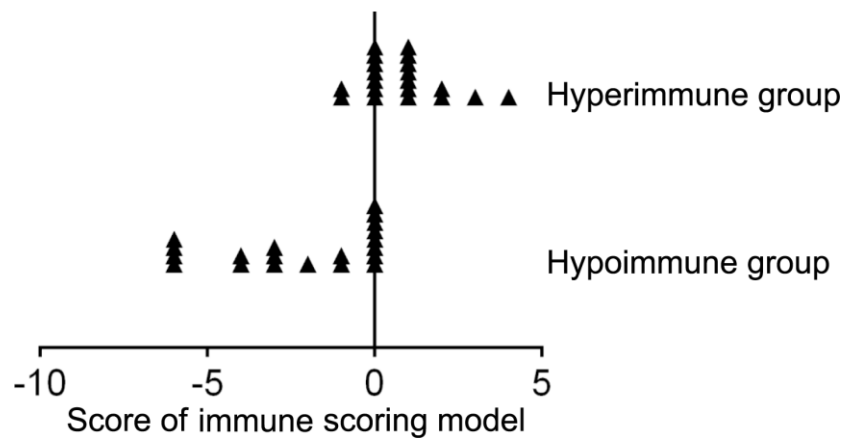

**Supplementary Figure 1.** The score distribution of the immune scoring model (based on combination of lymphocyte number and function) in patients with hyperimmune and hypoimmune status.
