# Supplementary material for: Establishing immune scoring model based on combination of the number, function, and phenotype of lymphocytes
Source: publisher site journal article supplement (doi:10.18632/aging.103208), 2020-05-12
Supplement: Supplementary file [file aging-v12i10-103208-supplementary-material-SD2.pdf]

## SUPPLEMENTARY TABLES

**Supplementary Table 1. Reference ranges of the percentages of T cells, B cells, and NK cells in different age groups.**

| Parameters                   |              | All           | Children      | Adolescents   | Adults        | Elders        | p      |
|------------------------------|--------------|---------------|---------------|---------------|---------------|---------------|--------|
|                              |              | N=261         | N=47          | N=72          | N=90          | N=52          |        |
| Age                          | Mean±SD      | 33.68±26.63   | 3.81±1.04     | 10.81±3.74    | 46±13.79      | 71.04±4.39    |        |
|                              | (Range)      | (1-82)        | (1-5)         | (6-18)        | (18-65)       | (66-82)       |        |
| Sex                          | Male: Female | 168:93        | 35:12         | 52:20         | 53:37         | 28:24         |        |
| T cell number                | Mean±SD      | 1559±688      | 2378±733      | 1845±515      | 1173±363      | 1092±314      | <0.001 |
|                              | (2.5%-97.5%) | (612-3313)    | (1214-3832)   | (1077-3035)   | (681-2021)    | (589-1712)    |        |
| T cells (%)                  | Mean±SD      | 66.71±7.81    | 67.68±6.24    | 69.19±5.5.98  | 67.62±7.28    | 60.82±9.18    | <0.001 |
|                              | (2.5%-97.5%) | (47.74-80.22) | (56.62-78.24) | (57.84-80.08) | (51.55-81.59) | (44.50-76.68) |        |
| B cells (%)                  | Mean±SD      | 14.44±6.29    | 20.45±6.2     | 17.18±4.69    | 10.65±3.69    | 11.76±5.9     | <0.001 |
|                              | (2.5%-97.5%) | (4.5-29.32)   | (10.33-34.30) | (9.71-26.50)  | (3.83-17.60)  | (4.33-26.47)  |        |
| NK cells (%)                 | Mean±SD      | 17.93±9.85    | 10.69±5.95    | 12.71±6.57    | 20.9±7.42     | 26.54±11.22   | <0.001 |
|                              | (2.5%-97.5%) | (3.99-40.72)  | (3.51-21.51)  | (3.92-26.58)  | (9.6-37.97)   | (8.73-47.73)  |        |
| CD4 <sup>+</sup> T cells (%) | Mean±SD      | 36.39±6.9     | 36.13±6       | 34.92±6.18    | 37.56±7.32    | 36.61±7.45    | <0.05  |
|                              | (2.5%-97.5%) | (23.18-49.33) | (25.56-45.85) | (23.59-49.08) | (24.82-51.33) | (22.27-49.13) |        |
| CD8 <sup>+</sup> T cells (%) | Mean±SD      | 24.33±6.71    | 24.77±5.05    | 27.18±5.55    | 24.45±6.63    | 19.78±7.22    | <0.001 |
|                              | (2.5%-97.5%) | (11.72-38.46) | (16.69-33.93) | (18.31-38.41) | (13.88-38.73) | (8.16-35.13)  |        |

SD: standard deviation. P means association between different parameters and age in all participants by using Spearman's rank correlation test.

**Supplementary Table 2. Reference ranges of lymphocyte number, function, and phenotype in different gender groups.**

| Parameters                                              |                         | all                          | Male                         | Female                       | P      |
|---------------------------------------------------------|-------------------------|------------------------------|------------------------------|------------------------------|--------|
|                                                         |                         | N=261                        | N=168                        | N=93                         |        |
| T cell number                                           | Mean±SD<br>(2.5%-97.5%) | 1559±688<br>(729-2946)       | 1589±670<br>(612-3056)       | 1505±715<br>(651-3357)       | >0.05  |
| T cells (%)                                             | Mean±SD<br>(2.5%-97.5%) | 66.71±7.81<br>(51.28-77.92)  | 66.09±7.92<br>(47.19-78.47)  | 67.83±7.49<br>(52.36-82.46)  | >0.05  |
| CD4 <sup>+</sup> T cells (%)                            | Mean±SD<br>(2.5%-97.5%) | 36.39±6.9<br>(25.36-47.92)   | 35.13±6.74<br>(23.68-48.73)  | 38.65±6.62<br>(23.93-50.45)  | <0.001 |
| CD4 <sup>+</sup> T cell number                          | Mean±SD<br>(2.5%-97.5%) | 836±355<br>(391-1598)        | 830±339<br>(373-1688)        | 847±383<br>(379-1892)        | >0.05  |
| CD8 <sup>+</sup> T cells (%)                            | Mean±SD<br>(2.5%-97.5%) | 24.33±6.71<br>(13.85-35.67)  | 24.81±6.82<br>(11.71-38.94)  | 23.45±6.41<br>(12.63-35.65)  | >0.05  |
| CD8 <sup>+</sup> T cell number                          | Mean±SD<br>(2.5%-97.5%) | 576±310<br>(190-1132)        | 604±306<br>(153-1442)        | 527±310<br>(183-1391)        | >0.05  |
| B cells (%)                                             | Mean±SD<br>(2.5%-97.5%) | 14.44±6.29<br>(5.94-25.43)   | 14.65±6.44<br>(4.36-30.69)   | 14.06±6.00<br>(5.57-27.63)   | >0.05  |
| B cell number                                           | Mean±SD<br>(2.5%-97.5%) | 358±252<br>(83-867)          | 369±237<br>(72-908)          | 337±276<br>(76-1143)         | >0.05  |
| NK cells (%)                                            | Mean±SD<br>(2.5%-97.5%) | 17.93±9.85<br>(5.16-36.6)    | 18.32±10.39<br>(4.02-46.07)  | 17.21±8.76<br>(4.11-33.29)   | >0.05  |
| NK cell number                                          | Mean±SD<br>(2.5%-97.5%) | 383±219<br>(125-851)         | 406±229<br>(105-943)         | 343±191<br>(98-740)          | <0.05  |
| IFN- $\gamma$ <sup>+</sup> CD4 <sup>+</sup> cells (%)   | Mean±SD<br>(2.5%-97.5%) | 17.84±8.85<br>(6.27-34.22)   | 16.74±8.37<br>(5.67-34.98)   | 19.83±9.35<br>(5.07-38.36)   | <0.01  |
| IFN- $\gamma$ <sup>+</sup> CD8 <sup>+</sup> T cells (%) | Mean±SD<br>(2.5%-97.5%) | 46.25±22.43<br>(14.64-85.51) | 43.76±22.17<br>(13.57-87.56) | 50.76±22.20<br>(13.75-87.72) | <0.05  |
| IFN- $\gamma$ <sup>+</sup> NK cells (%)                 | Mean±SD<br>(2.5%-97.5%) | 72.68±12.65<br>(49.96-89.57) | 72.57±12.26<br>(44.91-90.71) | 72.87±13.34<br>(42.97-90.87) | >0.05  |
| HLA-DR <sup>+</sup> T cells (%)                         | Mean±SD<br>(2.5%-97.5%) | 16.23±7.54<br>(6.82-31.29)   | 16.24±7.69<br>(6.06-34.44)   | 16.21±7.24<br>(6.54-33.06)   | >0.05  |
| CD28 <sup>+</sup> CD4 <sup>+</sup> T cells(%)           | Mean±SD<br>(2.5%-97.5%) | 94.95±7.03<br>(75.97-99.92)  | 95.22±7.07<br>(72.25-99.97)  | 94.44±6.94<br>(73.95-99.94)  | >0.05  |
| HLA-DR <sup>+</sup> CD4 <sup>+</sup> T cells (%)        | Mean±SD<br>(2.5%-97.5%) | 14.33±7.45<br>(5.96-29.07)   | 14.2±7.42<br>(5.87-30.90)    | 14.57±7.50<br>(4.89-32.89)   | >0.05  |
| CD45RO <sup>+</sup> CD4 <sup>+</sup> T cells (%)        | Mean±SD<br>(2.5%-97.5%) | 50.89±18.88<br>(23.29-82.03) | 49.53±18.78<br>(20.13-83.54) | 53.35±18.80<br>(21.59-84.33) | >0.05  |
| CD45RA <sup>+</sup> CD4 <sup>+</sup> T cells (%)        | Mean±SD<br>(2.5%-97.5%) | 49.04±18.88<br>(11.53-79.42) | 50.43±18.75<br>(11.76-79.87) | 46.55±18.87<br>(15.67-78.42) | >0.05  |
| CD28 <sup>+</sup> CD8 <sup>+</sup> T cells (%)          | Mean±SD<br>(2.5%-97.5%) | 62.06±17.3<br>(29.46-86.08)  | 62.61±17.78<br>(26.39-89.32) | 61.08±16.34<br>(27.84-88.06) | >0.05  |
| HLA-DR <sup>+</sup> CD8 <sup>+</sup> T cells (%)        | Mean±SD<br>(2.5%-97.5%) | 34.93±17.12<br>(12.47-66.36) | 34.75±17.24<br>(9.89-72.99)  | 35.24±16.90<br>(11.30-68.72) | >0.05  |

SD: standard deviation. P means association between different parameters and age in all participants by using Spearman's rank correlation test.

**Supplementary Table 3. The demographic and clinical characteristics of patients.**

| <b>Characteristic</b>                  | <b>Hypoimmune group (n=21)</b> | <b>Hyperimmune group (n=20)</b> |
|----------------------------------------|--------------------------------|---------------------------------|
| Mean age (mean±SD), years              | 49±16                          | 58±11                           |
| Male: Female                           | 16:5                           | 13:7                            |
| Underlying diseases                    |                                |                                 |
| malignancy undergoing therapy          | 8(38.09)                       |                                 |
| autoimmune disease receiving treatment | 3(14.29)                       |                                 |
| transplantation receiving treatment    | 2(9.52)                        |                                 |
| diabetes more than 10 years            | 3(14.29)                       |                                 |
| chronic renal failure                  | 1(4.76)                        |                                 |

SD: standard deviation.
